# Supplementary material
Source: Royal Society of Chemistry journal article supplement (doi:10.1039/d6ta00814c)
Supplement: d6ta00814c1.pdf [file d6ta00814c1.pdf]

Supporting Information

***Atomic-Layer-Deposited Pd/Cu<sub>2</sub>O/Cu Heterojunction as High-Efficiency Formate Catalysts and Boosting Aqueous Zn-CO<sub>2</sub> Batteries***

*Jia Xu, Li Tao, Yue Zhang, Evan J. Hansen, Robert Godin\* and Jian Liu\**

\*Corresponding authors.

E-mail: [jian.liu@ubc.ca](mailto:jian.liu@ubc.ca) (J. Liu); [robert.godin@ubc.ca](mailto:robert.godin@ubc.ca) (R. Godin)

## 1. Experimental Section

### 1.1 Materials

All chemical reagents were used directly without further treatment. Copper (II) Chloride ( $\text{CuCl}_2$ ; CAS No: 7447-39-4) and sodium hydroxide ( $\text{NaOH}$ ; CAS No: 1310-73-2) were purchased from Ward's Science. Ascorbic acid ( $\text{C}_6\text{H}_8\text{O}_6$ ; CAS No: 50-81-7) was purchased from VWR. Palladium hexafluoroacetylacetonate ( $\text{Pd}(\text{hfac})_2$ ; CAS No: 64916-48-9) was acquired from STREM Chemicals, INC. Potassium bicarbonate ( $\text{KHCO}_3$ ; CAS No: 5970-45-6) was acquired from Thermo Scientific Chemicals. Ethanol ( $\text{EtOH}$ ,  $\geq 99.7\%$ ) and isopropanol (*i*- $\text{PrOH}$ ,  $\geq 99.7\%$ ) were sourced from Alfa Aesar.

### 1.2 Synthesis of $\text{Cu}_2\text{O}$ nanocubes

$\text{Cu}_2\text{O}$  nanocubes were synthesized by slight modification of previous methods.<sup>[26]</sup> Specifically,  $\text{CuCl}_2$  aqueous solution ( $0.1 \text{ mol L}^{-1}$ ; 10 mL) was added dropwise to 90 mL of deionized water (DIW) and subsequently heated in a water bath at  $55 \text{ }^\circ\text{C}$ . Then,  $\text{NaOH}$  aqueous solution ( $2 \text{ mol L}^{-1}$ ; 10 mL) was added to the above aqueous solution and stirred for 0.5 h. Ascorbic acid solution ( $0.6 \text{ mol L}^{-1}$ ; 10 mL) was added dropwise, stirring at  $55 \text{ }^\circ\text{C}$  for an additional 3 h. The obtained orange precipitate was collected by centrifugation and rinsed at least three times with DIW and ethanol. Finally, the  $\text{Cu}_2\text{O}$  nanocube powder was dried in a vacuum drying box at room temperature.

### 1.3 Preparation of $\text{Cu}_2\text{O}/\text{Cu}$ and $\text{Pd}-\text{Cu}_2\text{O}/\text{Cu}$ catalyst

$\text{Pd}$  deposition on  $\text{Cu}_2\text{O}$  nanocubes was performed at  $150^\circ\text{C}$  with an alternating supply of  $\text{Pd}(\text{hfac})_2$  and plasma  $\text{H}_2$  into a plasma-enhanced atomic layer deposition (ALD) reactor (GEMStar™ XT Atomic Layer Deposition System). The  $\text{Pd}$  layers were deposited onto the  $\text{Cu}_2\text{O}$  nanocubes by adjusting the ALD cycle count to 100, which were named  $\text{Cu}_2\text{O}@\text{Pd}-100$ .

To prepare the catalyst ink, 10 mg of  $\text{Cu}_2\text{O}/\text{Pd}-100$  electrocatalyst was ultrasonically dispersed for 1 h into 500  $\mu\text{L}$  of isopropanol containing a 0.05 wt% Nafion™ solution and 60  $\mu\text{L}$  of distilled water. The resulting suspension was drop-casted onto a gas diffusion electrode (GDE) to achieve a catalyst loading of  $0.5 \text{ mg cm}^{-2}$ . The  $\text{Pd}-\text{Cu}_2\text{O}/\text{Cu}$  catalyst was then obtained by electrochemical reduction of the  $\text{Cu}_2\text{O}@\text{Pd}-100$  on a GDE in 0.5 M  $\text{KHCO}_3$  electrolyte at  $-0.5 \text{ V vs. RHE}$  for 10 min. For comparison, the  $\text{Cu}_2\text{O}/\text{Cu}$  catalyst was prepared using an identical electrochemical reduction procedure with pristine  $\text{Cu}_2\text{O}$  on a GDE.

#### 1.4 Characterization Methods

Raman spectroscopy was performed using a Bruker SENTERRA II spectrometer with a 532 nm laser operating at 25 mW. X-ray diffraction (XRD) measurements were performed using Cu-K $\alpha$  radiation ( $\lambda = 1.5418 \text{ \AA}$ ) at a scanning rate of  $5^\circ \text{ min}^{-1}$ . Scanning electron microscopy (SEM, Tescan Mira 3 XMU) and transmission electron microscopy (TEM, Tecnai F20) and high-angle annular dark field TEM (HAADF-TEM, Tecnai F20) were employed to investigate the morphology and microstructure of the samples. X-ray photoelectron spectroscopy (XPS) analyses were conducted on a PHI 5700 ESCA system. Inductively coupled plasma optical emission spectroscopy (ICP-AES, ThermoFisher iCAP 6000) was run out to test the Pd element content.

#### 1.5 Electrochemical characterization

Electrochemical measurements were carried out using a Biologic SP-150 electrochemical workstation. A three-electrode, Platinum mesh (CE), Ag/AgCl (RE) and GDE modified with electrocatalysts (WE) were applied with a 0.5 M KHCO<sub>3</sub> solution saturated with CO<sub>2</sub> (pH = 7.5). The H cell comprised two glass compartments connected by a metal clamp. The anolyte and catholyte were separated using a Nafion™ membrane (117 Nafion™) during the experimentation. The WE consisted of a gas diffusion electrode (GDE, Freudenberg H23C3, Model 1590044, Fuel Cell Store) modified with an electrocatalyst ink suspension. All measurements were performed in 0.5 M KHCO<sub>3</sub> electrolyte. A mass flow controller (ALICAT Scientific) was employed to regulate the CO<sub>2</sub> gas flow at 10 sccm. The electrochemical double-layer capacitance ( $C_{dl}$ ) was determined from cyclic voltammetry (CV) at various scan rates.

Gaseous products were analyzed using the H-type cell coupled with a gas chromatograph (Thermo Scientific, Trace 1300 series) equipped with an automated injection system. The GC was equipped with a pulsed discharge detector (PDD) and operated with an oven temperature ramp from 50 to 250 °C over 30 min. Liquid products in the electrolyte were analyzed *ex situ* by nuclear magnetic resonance (NMR) spectroscopy (Bruker AVII 600 MHz) using <sup>1</sup>H spectra with water suppression (Watergate W5 pulse sequence, 256 scans) after 20 min of chronoamperometry. For NMR analysis, 686  $\mu\text{L}$  of electrolyte (from the total 60 mL)

was mixed with 34  $\mu\text{L}$  of  $d_6$ -dimethyl sulfoxide (DMSO, internal standard, Sigma-Aldrich, CAS: 2206-27-1) and 80  $\mu\text{L}$  of  $\text{D}_2\text{O}$ .

Faradaic efficiency (FE) for gaseous products was calculated according to Equation (1):

$$FE\% = V \times \frac{Z_i C_i F}{i} \times 100 \quad (1)$$

Where  $V$  is the volume of gas leaving the cell,  $Z_i$  is the number of electrons transferred for the formation of the product,  $C_i$  is the concentration of the corresponding gas product,  $F$  is the Faraday constant, and  $i$  is the applied current.

Faradaic efficiency (FE) for liquid products was determined using Equation (2):

$$FE\% = V_{total} \times \frac{Z_i C_i F}{C_{total}} \times 100 \quad (2)$$

Where  $V_{total}$  is the total volume of the collected electrolyte sample,  $C_{total}$  is the total charge passed during electrolysis,  $Z_i$  is the number of electrons required to produce one molecule of the product,  $C_i$  is the concentration of the product determined from the NMR integration data, and  $F$  is the faraday constant.

The concentration of liquid products ( $C_i$ ) was calculated according to Equation (3):

$$C_i = \frac{I_i}{I_{std}} \times \frac{n_{std}}{n_i} C_{std} \quad (3)$$

Where  $I_i$  and  $I_{std}$  are the NMR integration areas of the product and the internal standard (DMSO), respectively, and  $n_i$  and  $n_{std}$  represent the number of protons contributing to the NMR signal of the product and the standard, respectively,  $C_{std}$  is the known concentration of the internal standard, used to calculate the single product concentration.

## 1.6 Zn-CO<sub>2</sub> battery measurement

A cell arrangement consisting of two chambers separated by a Nafion™ membrane (111 Nafion™) was used to construct the Zn-CO<sub>2</sub> battery as shown in the inset of **Figure 5b**. The electrocatalysts were drop-cast onto GDE with an areal loading of 0.5 mg cm<sup>-2</sup> and a cathode

area of 1 cm<sup>2</sup>. The anode using Zn foil was first cleaned with isopropanol. The anolyte chamber was filled with a 1.0 M KOH + 0.02 M Zn(CH<sub>3</sub>CO<sub>2</sub>)<sub>2</sub> solution, the catholyte chamber was filled with a 0.5 M KHCO<sub>3</sub> solution, and the gas chamber on the cathode side was continuously purged with CO<sub>2</sub> at 10 sccm. The CO<sub>2</sub> battery performance was tested using galvanostatic charge and discharge testing with a Biologic SP-150 workstation. The charge and discharge cycles were each set to 20 mins (total 40 mins per cycle), and linear sweep voltammetry (LSV) was performed at 10 mV s<sup>-1</sup> to produce the polarization curves.

### 1.7 Computational details

All calculations were performed within the framework of density functional theory (DFT) using the projector augmented plane-wave (PAW) method, as implemented in the Vienna Ab Initio Simulation Package (VASP).<sup>[1]</sup> The generalized gradient approximation (GGA) proposed by Perdew, Burke, and Ernzerhof (PBE) was adopted for the exchange-correlation potential.<sup>[2]</sup> Long-range van der Waals interactions were described using the DFT-D3 approach.<sup>[3]</sup> A plane-wave cutoff energy of 400 eV was employed. A vacuum layer of 20 Å was added perpendicular to the sheet to prevent artificial interactions between periodic images. Brillouin zone integration was performed using a 1 × 1 × 1 k-point mesh. All structures were relaxed until the residual forces on the atoms decreased to less than 0.05 eV/Å.

### References

- 1) Kresse, G.; Joubert, D. From ultrasoft pseudopotentials to the projector augmented-wave method. *Physical Review B* 1999, 59, 1758-177.
- 2) Perdew, J. P.; Burke, K.; Ernzerhof, M. Generalized gradient approximation made simple. *Physical Review Letters* 1996, 77, 3865-3868.
- 3) Grimme S, Antony J, Ehrlich S and Krieg H 2010 A consistent and accurate ab initio parametrization of density functional dispersion correction (DFT-D) for the 94 elements H-Pu *Journal of Chemical Physics* 2010, 132, 154104.

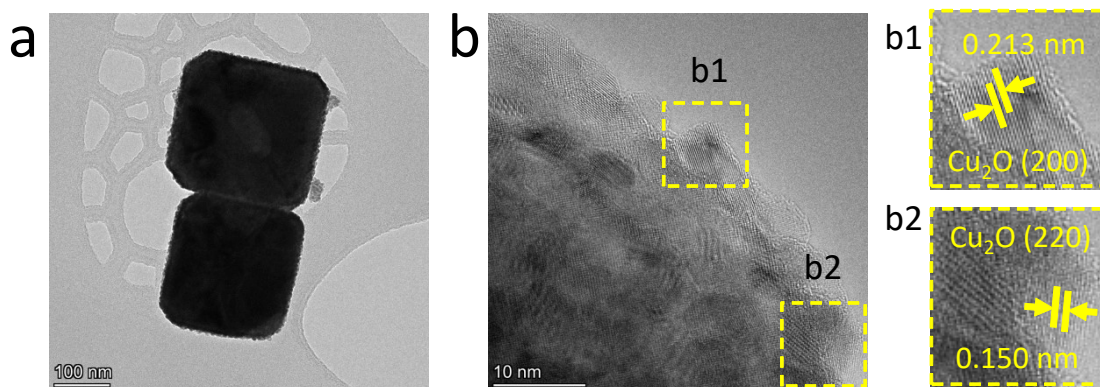

**Figure S1** (a, b) TEM images of  $\text{Cu}_2\text{O}$ . (b1, b2) Enlarged TEM images of  $\text{Cu}_2\text{O}$ .

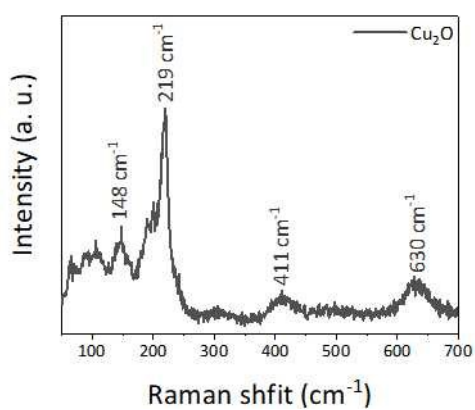

**Figure S2** Raman spectrum of  $\text{Cu}_2\text{O}$ .

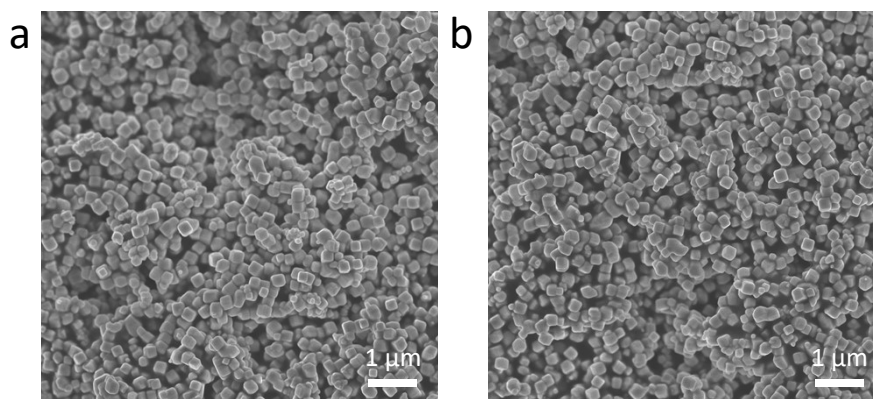

**Figure S3** SEM images of  $\text{Cu}_2\text{O}@Pd-100$ .

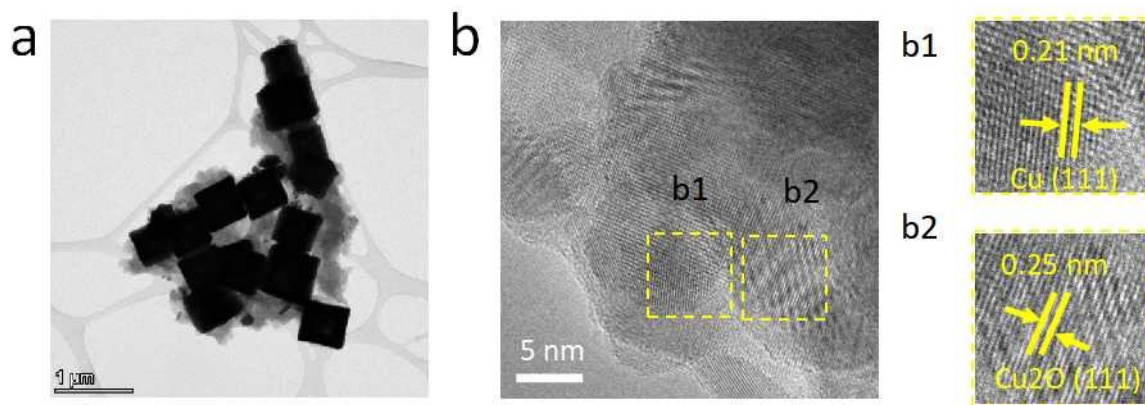

**Figure S4** (a) TEM and (b) HR-TEM images of  $\text{Cu}_2\text{O}/\text{Cu}$ . (b1, b2) Enlarged TEM images of  $\text{Cu}_2\text{O}/\text{Cu}$ .

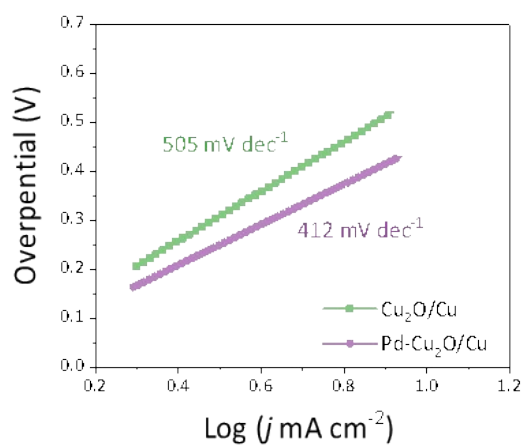

**Figure S5** Tafel slopes of  $\text{Cu}_2\text{O}/\text{Cu}$  and  $\text{Pd}-\text{Cu}_2\text{O}/\text{Cu}$ .

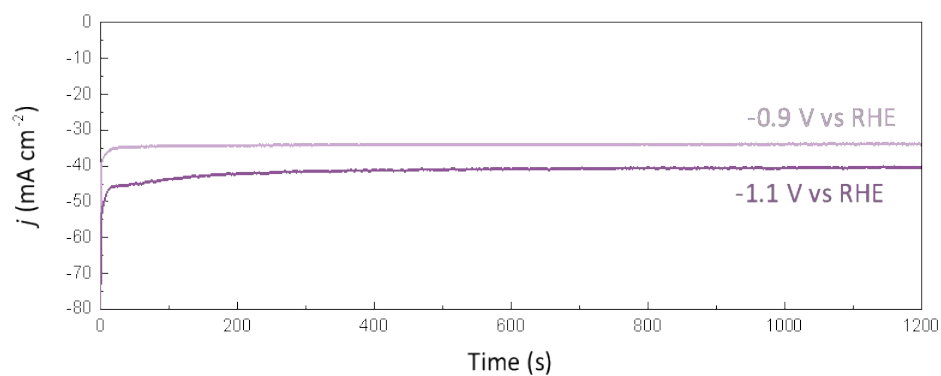

**Figure S6** The chronoamperometry (CA) curves of  $\text{Pd}-\text{Cu}_2\text{O}/\text{Cu}$  at  $-0.9\text{ V}$  and  $-1.1\text{ V}$  (vs RHE).

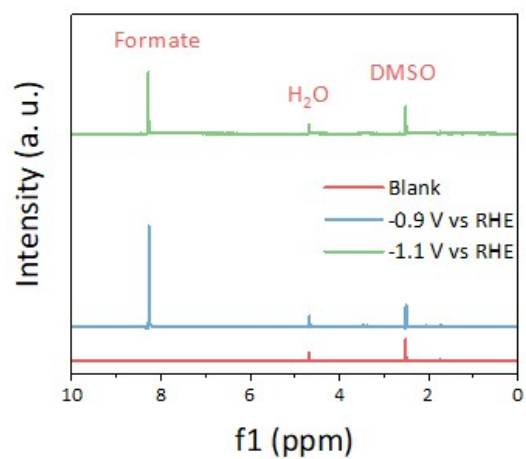

**Figure S7** <sup>1</sup>H NMR spectra of Pd-Cu<sub>2</sub>O/Cu.

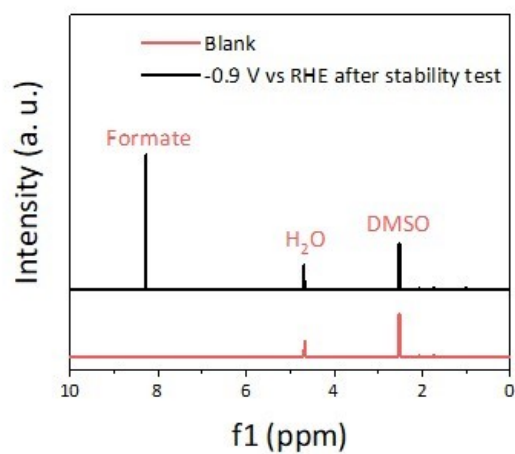

**Figure S8** <sup>1</sup>H NMR spectra of Pd-Cu<sub>2</sub>O/Cu after stability test at -0.9 V (vs RHE) for 12h.

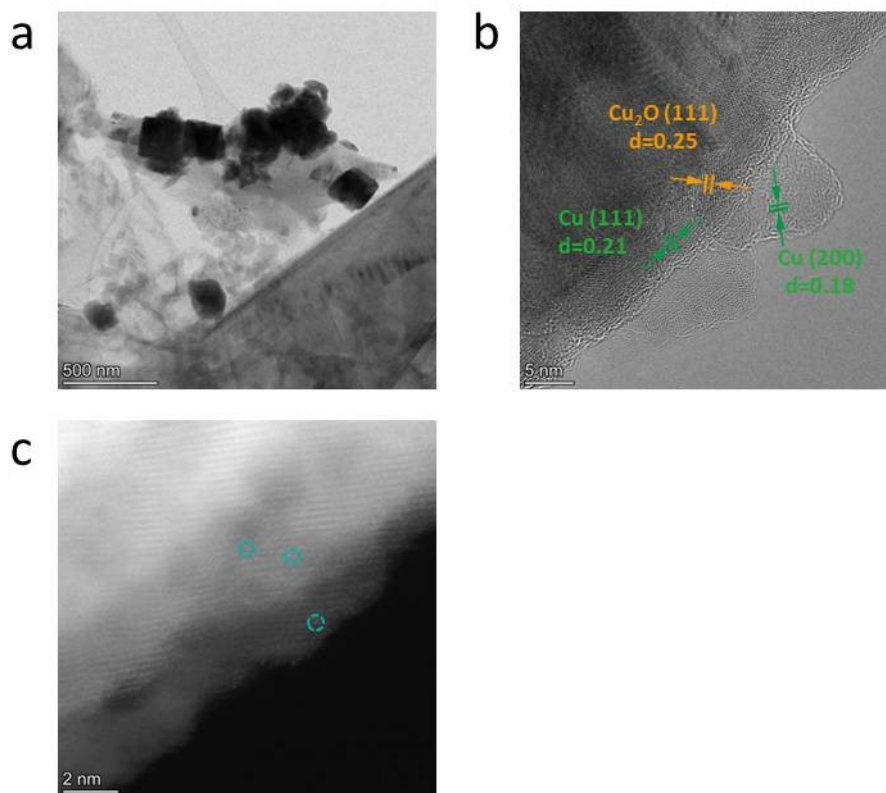

**Figure S9** (a) TEM, (b) HRTEM and (c) AC-HAADF-STEM images of Pd-Cu<sub>2</sub>O/Cu after stability test at -0.9 V (vs RHE) for 12h.

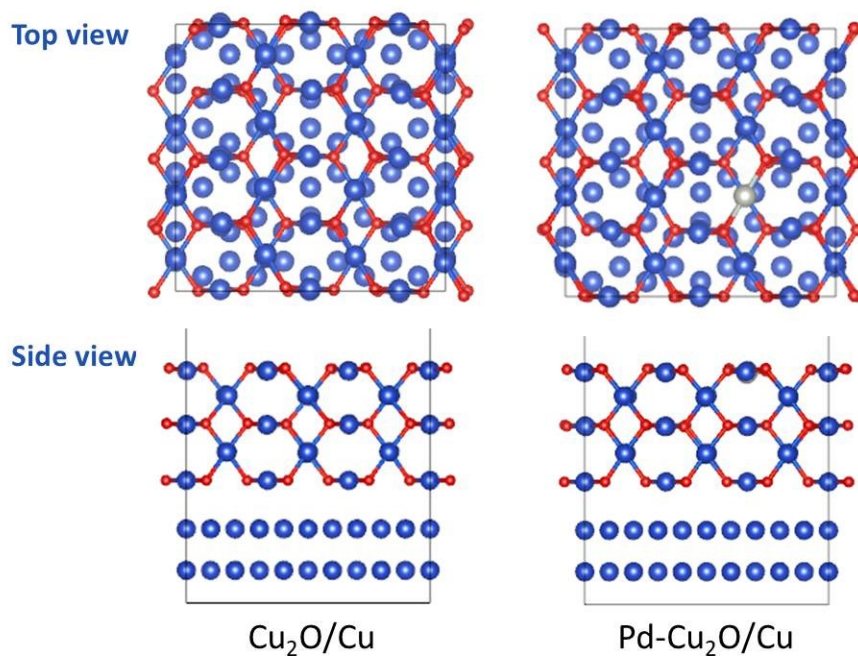

**Figure S10** Top view and side view of Cu<sub>2</sub>O/Cu and Pd-Cu<sub>2</sub>O/Cu models.

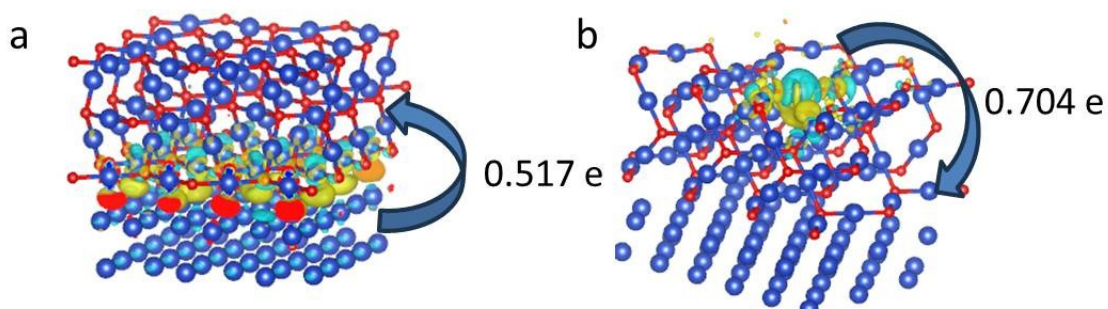

**Figure S11** Differential charge density of (a)  $\text{Cu}_2\text{O}/\text{Cu}$  and (b)  $\text{Pd-Cu}_2\text{O}/\text{Cu}$  models.

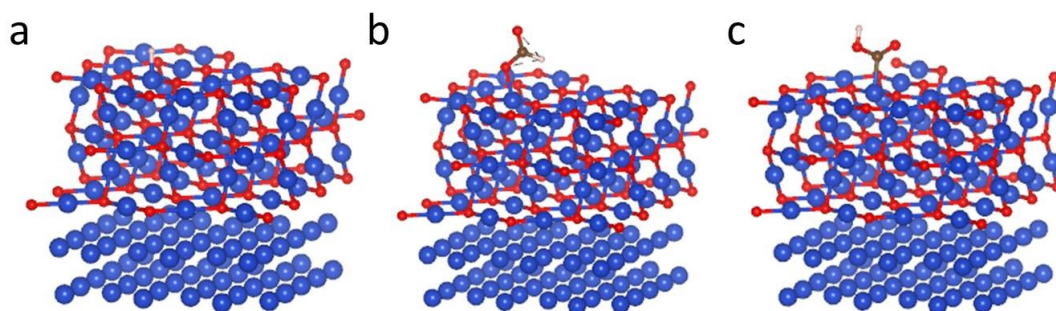

**Figure S12** Schematic diagram of (a)  $^*\text{H}$ , (b)  $^*\text{OCHO}$  and (c)  $^*\text{COOH}$  adsorbed on  $\text{Cu}_2\text{O}/\text{Cu}$ .

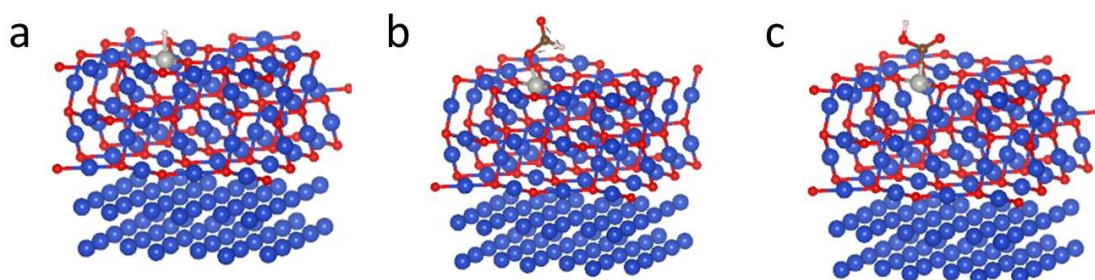

**Figure S13** Schematic diagram of (a)  $^*\text{H}$ , (b)  $^*\text{OCHO}$  and (c)  $^*\text{COOH}$  adsorbed on  $\text{Pd-Cu}_2\text{O}/\text{Cu}$ .

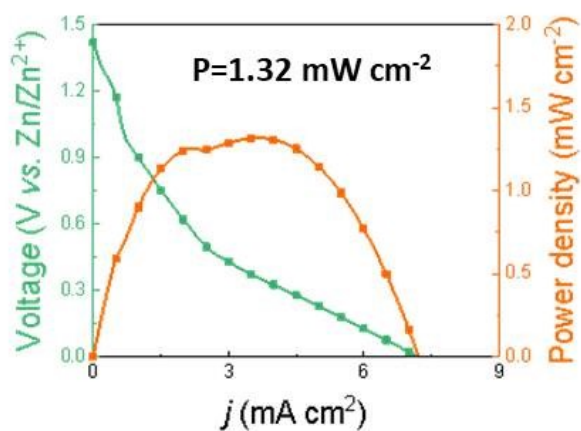

**Figure S14** Discharge curves and power density of ZCBs with  $\text{Cu}_2\text{O}/\text{Cu}$  as the cathode.

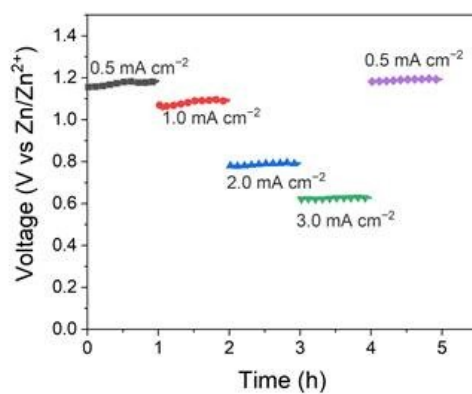

**Figure S15** Galvanostatic discharge curves at different current densities.

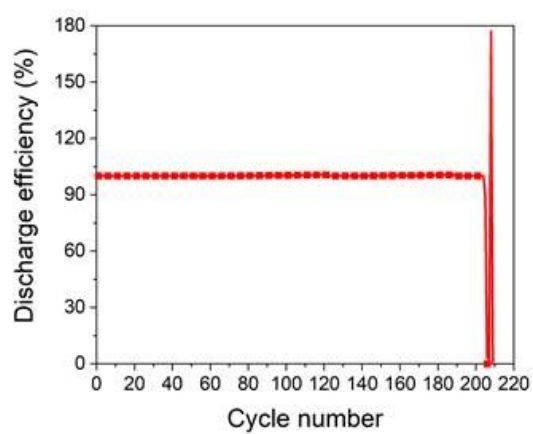

**Figure S16** Discharge efficiency of ZCBs at 0.5 mA cm<sup>-2</sup>.

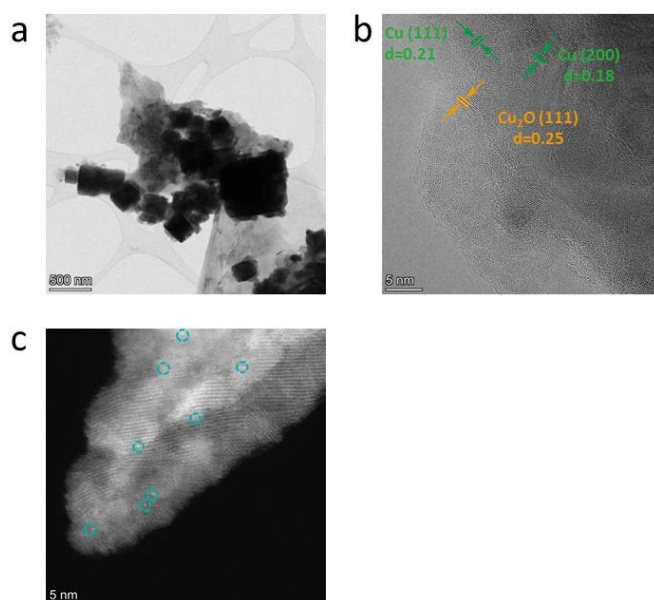

**Figure S17** (a) TEM, (b) HRTEM and (c) AC-HAADF-STEM images of Pd-Cu<sub>2</sub>O/Cu as the cathode after ZCBs cycling.

**Tables S1.** Comparison of the performance of the presented Pd–Cu<sub>2</sub>O/Cu catalyst with several recently reported CO<sub>2</sub>-to-HCOOH reduction catalysts.

| Catalysts                                 | Electrolyte                   | Products       | Voltage (V vs RHE) | FE (%)       | $j_{\text{formate}}$ (mA cm <sup>-2</sup> ) | Stability (h) | Ref.                                       |
|-------------------------------------------|-------------------------------|----------------|--------------------|--------------|---------------------------------------------|---------------|--------------------------------------------|
| <b>Pd–Cu<sub>2</sub>O/Cu</b>              | <b>0.5 M KHCO<sub>3</sub></b> | <b>Formate</b> | <b>-0.9</b>        | <b>61.1%</b> | <b>~24</b>                                  | <b>12</b>     | <b>This work</b>                           |
| <b>Cu<sub>2</sub>O@Cu</b>                 | 0.5 M KHCO <sub>3</sub>       | Formate        | -0.6               | ~50%         | ~20                                         | -             | Energy Environ. Sci. 2024, 17, 6779-6786.  |
| <b>Pd<sub>40</sub>/Cu<sub>2</sub>O-Cu</b> | 0.5 M KHCO <sub>3</sub>       | Formate        | -0.25              | 92%          | -4.5                                        | 3             | ChemSusChem 2019, 12, 4471-4479.           |
| <b>CuS<sub>x</sub>-Ag/Cu</b>              | 0.1 M KHCO <sub>3</sub>       | Formate        | -0.6               | 87%          | -9.6                                        | 65            | ACS Catal. 2022, 12, 21, 13174–13185.      |
| <b>Sn-CF1000</b>                          | 0.1 M KHCO <sub>3</sub>       | Formate        | -0.69              | 62%          | -11                                         | 24            | Adv. Energy Mater. 2018, 8, 1702524.       |
| <b>Densed tip Sn</b>                      | 1.0 M KHCO <sub>3</sub>       | Formate        | -0.76              | 50%          | ~62.5                                       | 72            | J. Mater. Chem. A 2020, 8, 9032-9038.      |
| <b>SnO<sub>2</sub> NPs</b>                | 1.0 M KOH                     | Formate        | -0.95              | 46%          | 147                                         | -             | J. Mater. Chem. A 2018, 6, 10313-10319.    |
| <b>Pd–B/C</b>                             | 0.1 M KHCO <sub>3</sub>       | Formate        | -0.5               | 70%          | ~3.98                                       | 5             | J. Am. Chem. Soc. 2018, 140, 8, 2880–2889. |
| <b>Sn/SnO<sub>x</sub> thin film</b>       | 0.5 M NaHCO <sub>3</sub>      | Formate        | -0.7               | 70%          | 1.6                                         | 12            | J. Am. Chem. Soc. 2012, 134, 1986.         |
| <b>Sn gas diffusion electrode</b>         | 0.1 M NaHCO <sub>3</sub>      | Formate        | -1.2               | 64%          | -                                           | 2             | J. Mater. Chem. A 2014, 2, 1647.           |
| <b>Pd/hNCNCs</b>                          | 0.1 M KHCO <sub>3</sub>       | Formate        | -0.27              | 99.8%        | ~2                                          | 8             | Adv. Mater. 2020, 32, e2000992.            |

**Tables S2.** Comparison of Zn–CO<sub>2</sub> battery performance.

| Catalysts                                  | Catholyte                                           | Discharge products | OCV (V)     | Power density (mW cm <sup>-2</sup> ) | Stability (h) | Ref.                                                  |
|--------------------------------------------|-----------------------------------------------------|--------------------|-------------|--------------------------------------|---------------|-------------------------------------------------------|
| <b>Pd–Cu<sub>2</sub>O/Cu</b>               | <b>0.5 M KHCO<sub>3</sub></b>                       | <b>Formate</b>     | <b>1.41</b> | <b>2.54</b>                          | <b>135</b>    | <b>This work</b>                                      |
| <b>Bi-D</b>                                | 2 M KHCO <sub>3</sub><br>+ 0.02 M HCOO <sup>-</sup> | Formate            | 1.3         | 1.2                                  | 22            | Chem. Commun. 2022, 58, 3621.                         |
| <b>Cu–N<sub>2</sub>/GN</b>                 | 0.5 M KHCO <sub>3</sub>                             | CO                 | -           | 0.62                                 | 40            | Adv. Funct. Mater. 2020, 30, 1907658.                 |
| <b>BiC/HCS</b>                             | 0.1 M KHCO <sub>3</sub>                             | Formate            | 0.94        | 7.2 ± 0.5                            | 10            | Applied Catalysis B: Environmental 2022, 307, 121145. |
| <b>BiPd</b>                                | 0.1 M KHCO <sub>3</sub> + 0.1 M HCOONa              | Formate            | 1.2         | 0.42                                 | 45            | ACS Appl. Nano Mater. 2022, 5, 12387–12394.           |
| <b>Ir@Au</b>                               | 0.8 M KHCO <sub>3</sub>                             | CO                 | 0.71        | -                                    | 30            | Adv. Mater. 2019, 31, 1807807.                        |
| <b>Fe<sub>1</sub>NC/S<sub>1</sub>-1000</b> | 0.8 M KHCO <sub>3</sub>                             | CO                 | 0.73        | 0.6                                  | 25            | Adv. Mater. 2020, 32, 2002430.                        |
| <b>NOMC</b>                                | 0.8 M KHCO <sub>3</sub>                             | CO                 | 0.9         | 0.71                                 | 100           | Small Methods 2021, 2001039.                          |
| <b>Pd deposited carbon paper</b>           | 0.1 M NaCl + 0.1 M HCOONa                           | HCOOH              | 0.9         | -                                    | 30            | Angew. Chem. Int. Ed. 2018, 57, 16996-17001.          |
| <b>FeN<sub>5</sub>@DNC</b>                 | 0.5 M KHCO <sub>3</sub>                             | CO                 | -           | 0.6                                  | 24            | Angew. Chem. Int. Ed. 2024, 63 e202406030.            |
| <b>CoPc@DNHCS-8</b>                        | 0.8 M KHCO <sub>3</sub>                             | CO                 | -           | 1.02                                 | 40            | Adv. Funct. Mater. 2022, 32, 2110649.                 |
| <b>CuNi-DSACs</b>                          | 1.0 M KHCO <sub>3</sub>                             | CO                 | -           | 1.04                                 | 46            | Angew. Chem. Int. Ed. 2024, e202415223.               |
| <b>PNCB</b>                                | 2 M KHCO <sub>3</sub> + 0.2 M HCOOH                 | HCOOH              | 1.1         | 1.43                                 | 20            | Nano Energy 2022, 92, 106780.                         |
| <b>s-SnLi</b>                              | 6 M KOH + 0.02 M Zn(Ac) <sub>2</sub>                | HCOOH              | 0.14        | 1.24                                 | 85            | Angew. Chem. Int. Ed. 2021, 60, 25741-25745.          |
